# Supplementary material
Source: PubMed Central journal article supplement (PMC5425946)
Supplement: ct7b00077_si_001.pdf [file ct7b00077_si_001.pdf]

**Supporting Information**

**for**

**Simulating Protein Mediated Hydrolysis of ATP and Other Nucleoside Triphosphates by  
Combining QM/MM Molecular Dynamics with Advances in Metadynamics**

Rui Sun, Olaseni Sode, James F. Dama, and Gregory A. Voth\*

Department of Chemistry, James Franck Institute, and Institute for Biophysical Dynamics,  
The University of Chicago, 5735 South Ellis Avenue, Chicago, Illinois 60637, United States

\*Corresponding Author: [gavoth@uchicago.edu](mailto:gavoth@uchicago.edu)

An input example (only metadynamics part) for MBMetaD simulations with PLUMED. The additionally required parameters for MBMetaD are denoted in blue with a brief explanation in red. A detailed user manual is available upon request at [gavoth@uchicago.edu](mailto:gavoth@uchicago.edu). The other parameters are required by a regular MetaD simulation (i.e. WTMetaD), and the most recent user manual of PLUMED can be found at <https://plumed.github.io/doc-v2.3/user-doc/html/index.html>.

n: METAD ...

ARG=CV

SIGMA=0.050

HEIGHT=1.0

PACE=40

BIASFACTOR=5

STORE\_GRIDS

TEMP=310

GRID\_NOSPLINE

GRID\_WSTRIDE=80

GRID\_WFILE=3cv-1.dat

GRID\_MIN=0.5

GRID\_MAX=2.5

GRID\_BIN=200

FILE=HILLS

BIASFACTOR=6.0

# Calling MBMetaD functional

USE\_DOMAINS

# The range that MBMetaD fills is updated along the simulation

USE\_ADAPTIVE\_DOMAINS

# The region is checked for a new definition every finite number of steps (i.e. 40)

ADAPTIVE\_DOMAINS\_STRIDE=40

# The maximum bias energy is referred to the minimum/transition state in CV space

ADAPTIVE\_DOMAINS\_REFERENCE=minimum

# The maximum bias energy value (i.e. 6 kcal/mol)

ADAPTIVE\_DOMAINS\_ENERGY\_OFFSET=6

# The region is redefined if the energy at the boundary has changed by (i.e. 0.154 kcal/mol)

ADAPTIVE\_DOMAINS\_ENERGY\_INCREMENT=0.154

# The numerical integrals will add hills once every finite number of points (i.e. 3.5) rather than every single point.

ADAPTIVE\_DOMAINS\_DOWNSAMPLING=3.5

# The histogram of the CV values in MBMetaD simulation

ADAPTIVE\_DOMAINS\_HISTOGRAM\_WFILE=3cv\_histo-1

... n:

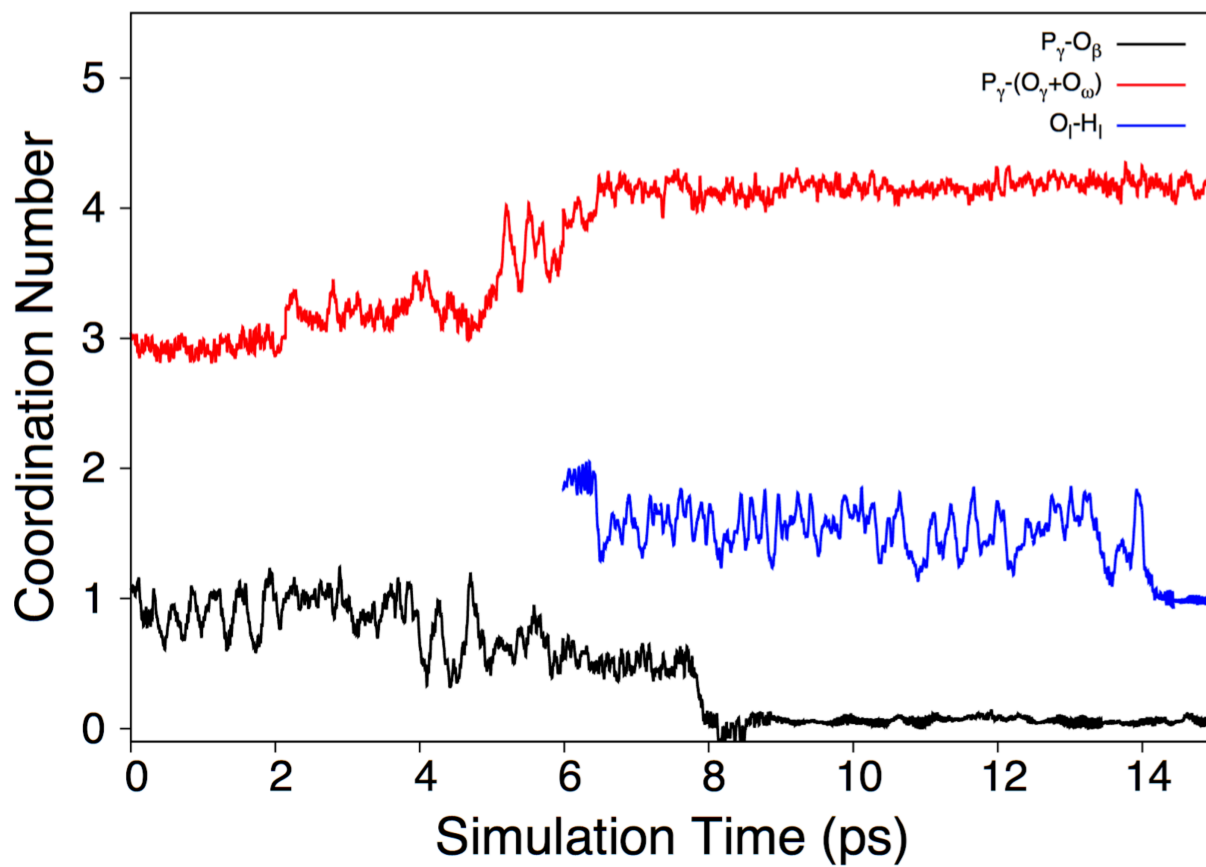

**Figure S1.** The evolution of the CVs for the testing trajectory of hydrolysis in F-Actin. The MBMetaD biasing CV (blue) is applied after the formation of  $[\text{H}_2\text{O}--\text{PO}_3]^-$  intermediate.

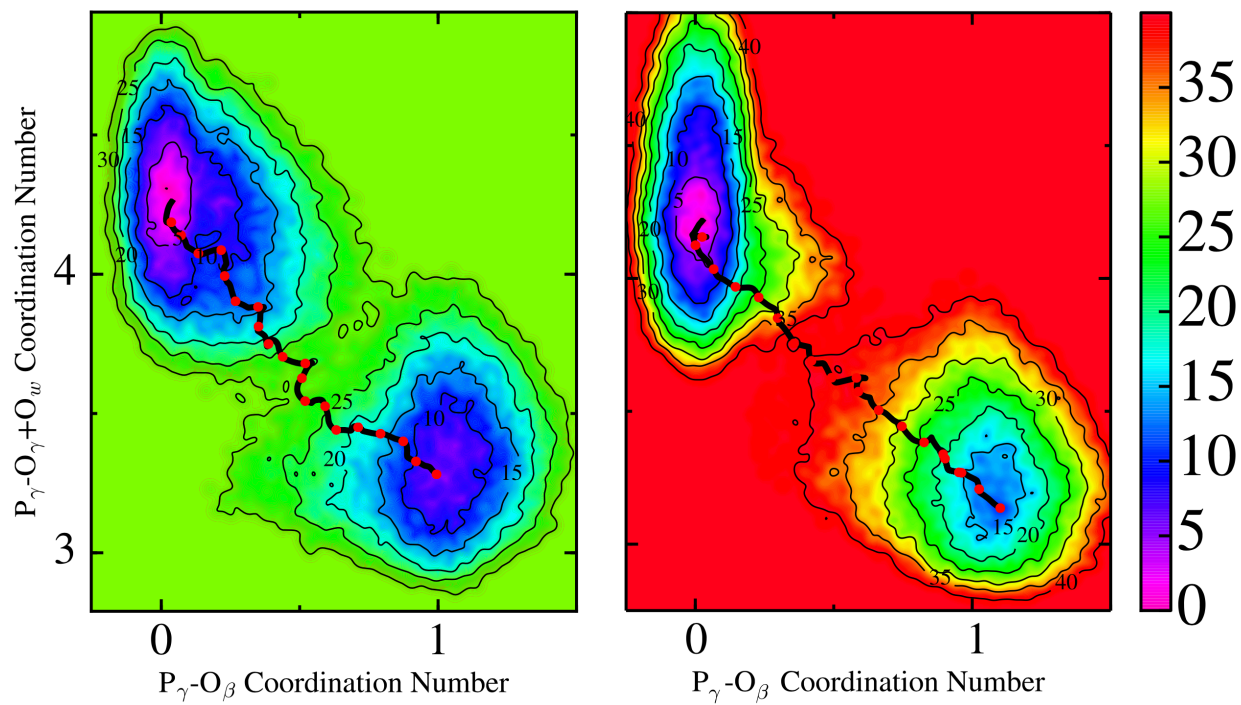

**Figure S2.** The ATP hydrolysis in F- (left) and G-actin (right) PMF from non-tempered MetaD simulations as described in the main text (data from *J. Am. Chem. Soc.* **2014**, 136, 13053–13058). The unit of energy is kcal/mol.

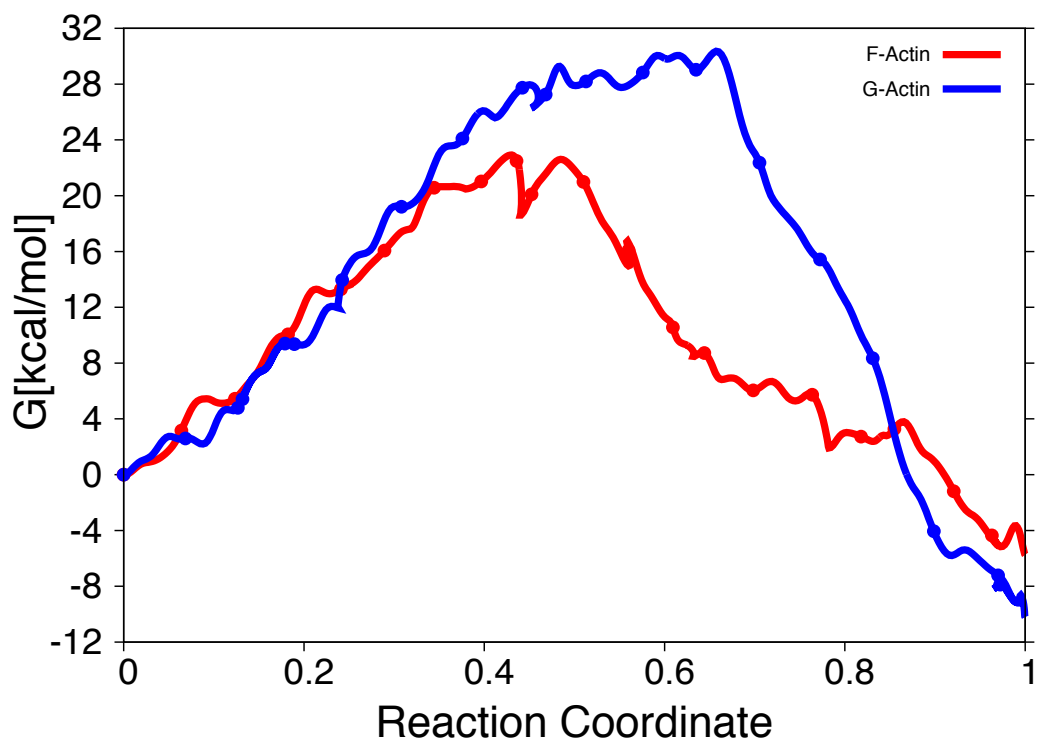

**Figure S3.** The minimum free energy path from the 2D free energy surfaces (Fig. S2) for ATP hydrolysis in F- and G-actin. The reaction coordinate represents the hydrolysis reaction progress along the minimum free energy path, i.e. “0” being ATP and “1” being ADP + Pi. (data from *J. Am. Chem. Soc.* **2014**, 136, 13053–13058). The unit of energy is kcal/mol.
